# Supplementary material for: The COVID-19 outbreak in Sichuan, China: Epidemiology and impact of interventions
Source: PLOS journal article supplement (doi:10.1371/journal.pcbi.1008467), 2020-12-28

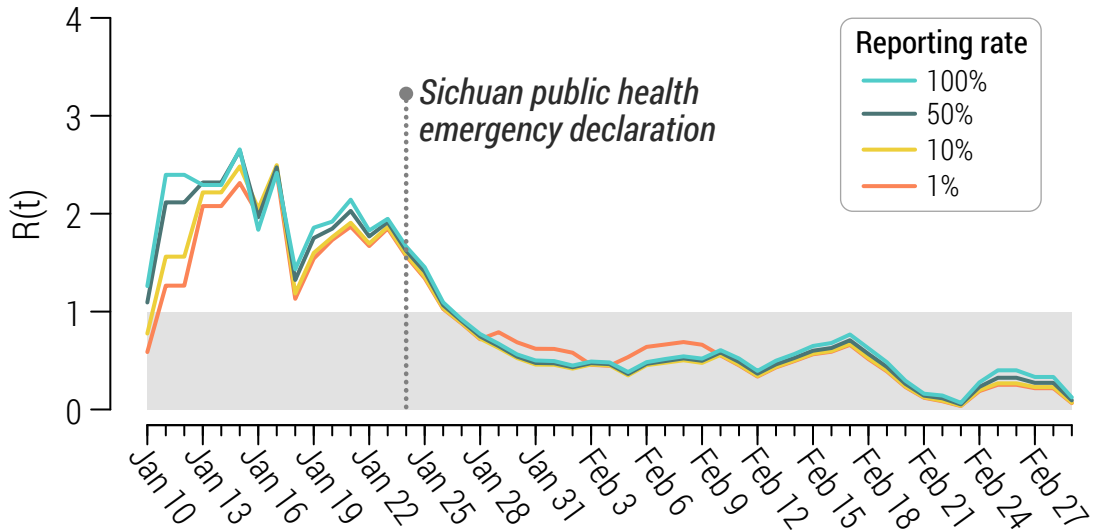

Supplement: S1 (10.1371/journal.pcbi.1008467.s001) [file journal.pcbi.1008467.s001]
